## Retraction Statement

Paper by Boyu Tian, Chunxiang E., Yang Xiang, and Peng Teng entitled “Long Noncoding RNA LIPE-AS1 Drives Prostate Cancer Progression by Functioning as a Competing Endogenous RNA for microRNA-654-3p and Thereby Upregulating Hepatoma-Derived Growth Factor” [Urol Int. 2021;105:875–890, DOI: 10.1159/000516676]

The article “Long Noncoding RNA LIPE-AS1 Drives Prostate Cancer Progression by Functioning as a Competing Endogenous RNA for microRNA-654-3p and Thereby Upregulating Hepatoma-Derived Growth Factor” [Urol Int. 2021;105:875–890, DOI: 10.1159/000516676] by Boyu Tian, Chunxiang E., Yang Xiang, and Peng Teng has been retracted by the Publisher and the Editors on behalf of the authors.

Following publication, the corresponding author informed us that Chunxiang E. was included as a co-author without their knowledge. Data generated by Chunxiang E. was presented in the article without their agreement. The corresponding author requested the retraction on behalf of all authors based on the above.
